# Supplementary material for: Ultrasensitive Fe3+ ion detection based on pH-insensitive fluorescent graphene nanosensors in strong acid and neutral media
Source: Royal Society of Chemistry journal article supplement (doi:10.1039/d0nj06201d), 2021-01-01
Supplement: d0nj06201d1.pdf [file d0nj06201d1.pdf]

Electronic Supplementary Material (ESI) for New Journal of Chemistry.

Electronic Supplementary Material (ESI)

**UltraSensitive Fe<sup>3+</sup> ion detection based on pH-insensitive fluorescent graphene nanosensors in strong acid and neutral media**

Songlin Chen<sup>a</sup>, Yajing Huang<sup>a</sup>, Yang Yang<sup>a</sup>, Fanghua Luo<sup>a</sup>, Qinghua Zhao<sup>ab</sup>, Guohua Chen<sup>ab\*</sup>

<sup>a</sup>College of Materials Science and Engineering, Huaqiao University, Jimei Road 668, 361021 Xiamen, P.R.China E-mail: hdcgh@hqu.edu.cn

<sup>b</sup>Graphene Powder & Composite Research Center of Fujian Province, Jimei Road 668, 361021 Xiamen, P.R.China

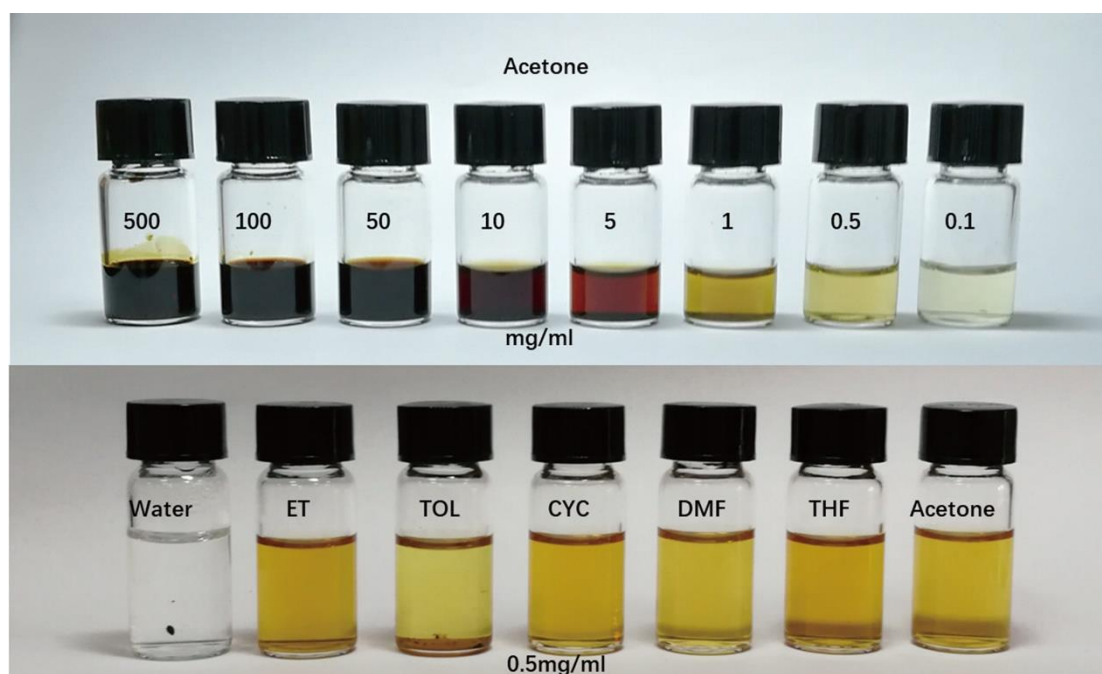

Figure S1: The dispersion pattern of FRGO in acetone from 0.1 to 500 mg/ml and the dispersion pattern of FRGO in different solvents at 0.5 mg/ml

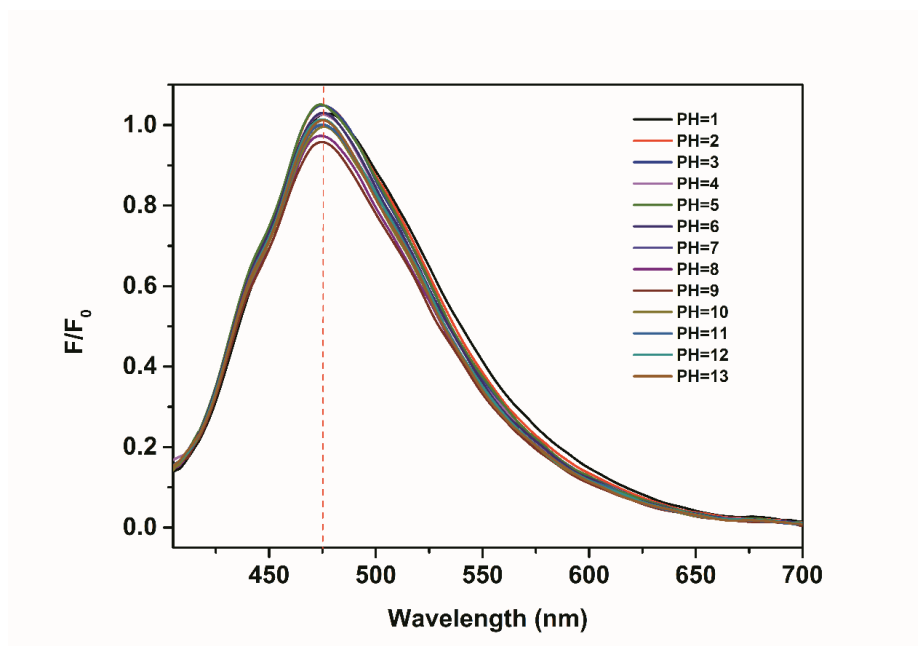

Figure S2: Fluorescence intensity at 475 nm upon excitation at 375 nm as a function of pH.

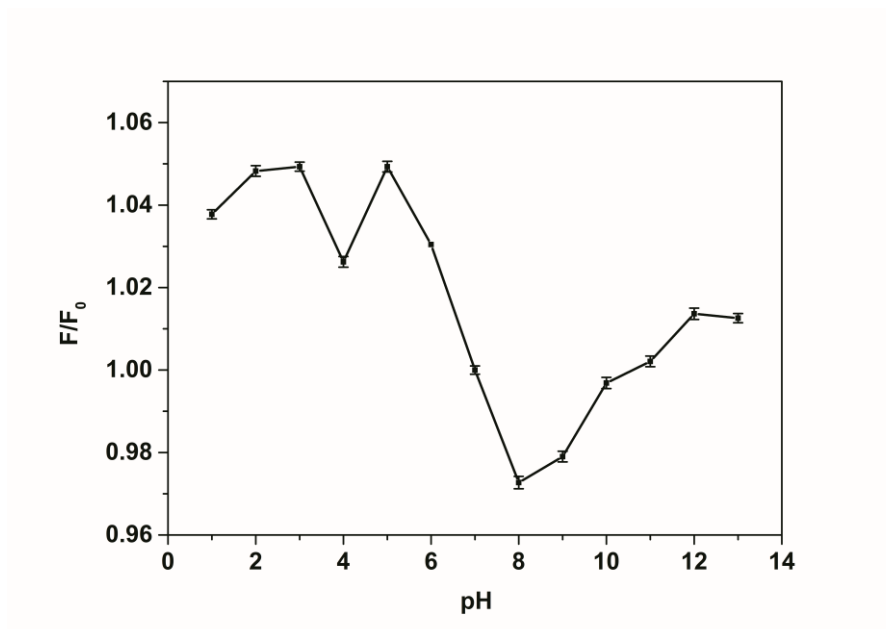

Figure S3: Fluorescence intensity at 475 nm upon excitation at 375 nm as a function of pH.

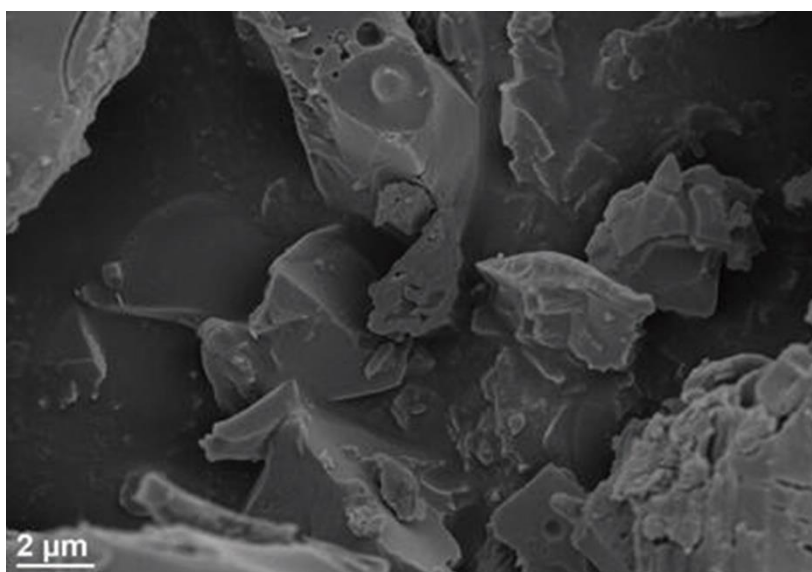

Figure S4: SEM image of FRGO

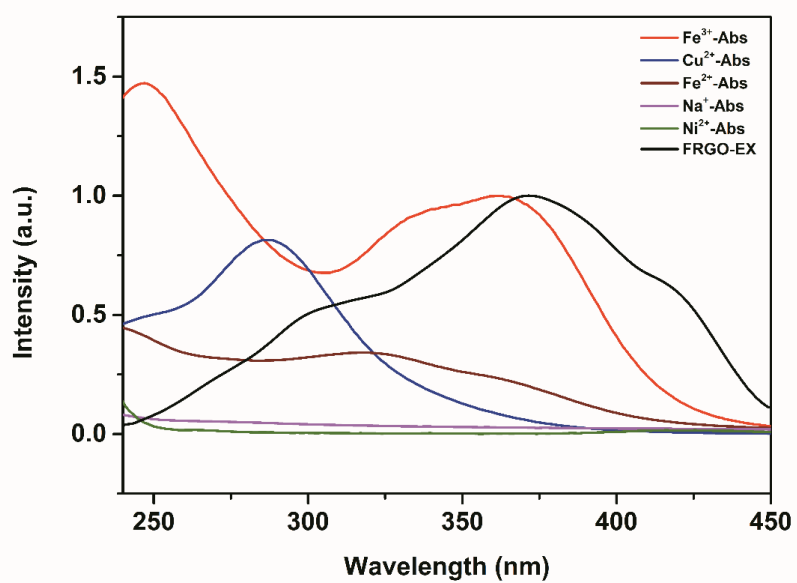

Figure S5: The excitation spectrum of FRGO and the UV-vis absorption spectra of Fe<sup>3+</sup>, Cu<sup>2+</sup>, Fe<sup>2+</sup>, Na<sup>+</sup>, Ni<sup>2+</sup>.

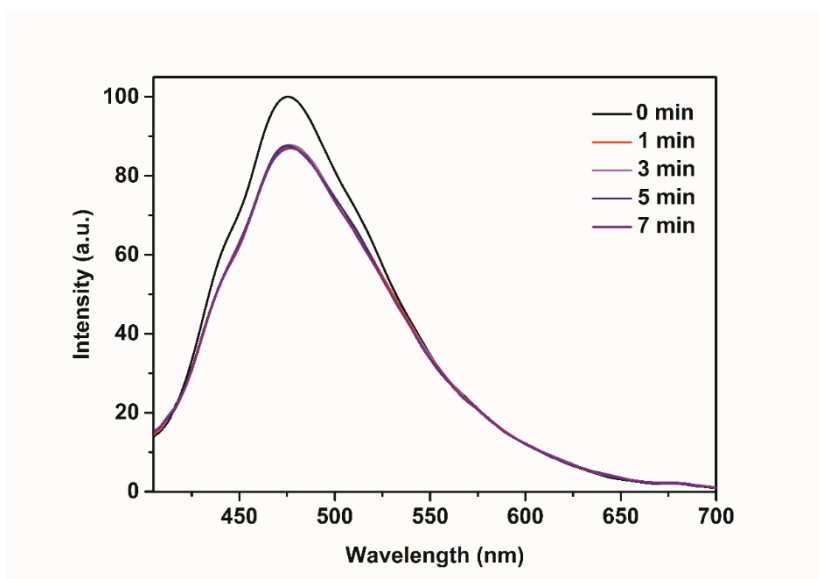

Figure S6: Time-dependent fluorescence change of the FRGO in the presence of  $\text{Fe}^{3+}$   $20\mu\text{M}$ .

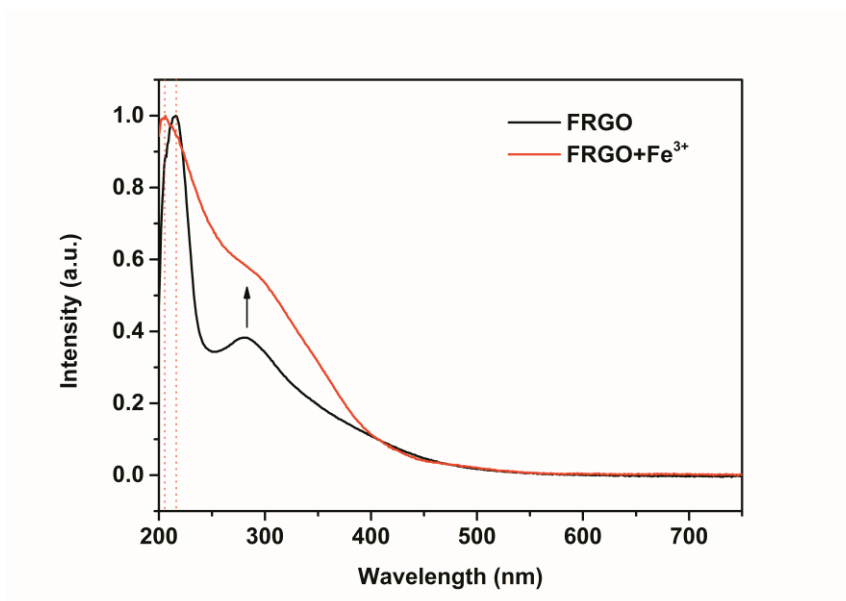

Figure S7: UV-Vis changes of the FRGO (0.03mg/ml) and that after adding of  $\text{Fe}^{3+}$  (2mM).

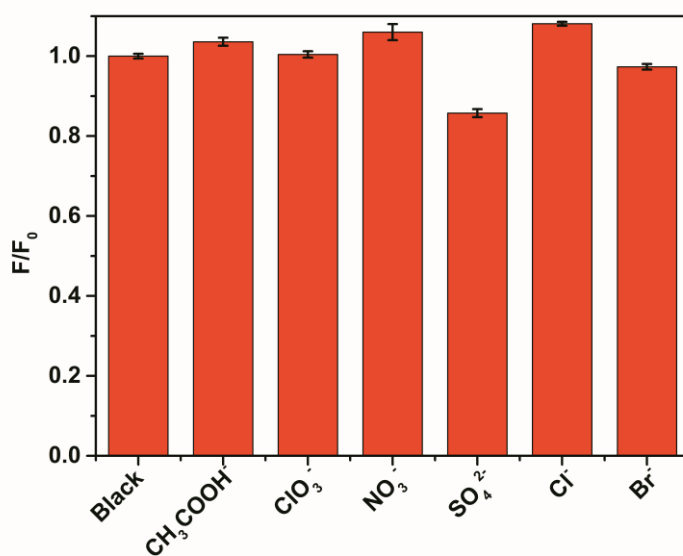

Figure S8: The relative FL ratio of FRGO in the absence and presence of various anion ions at a concentration of 0.2 mM.

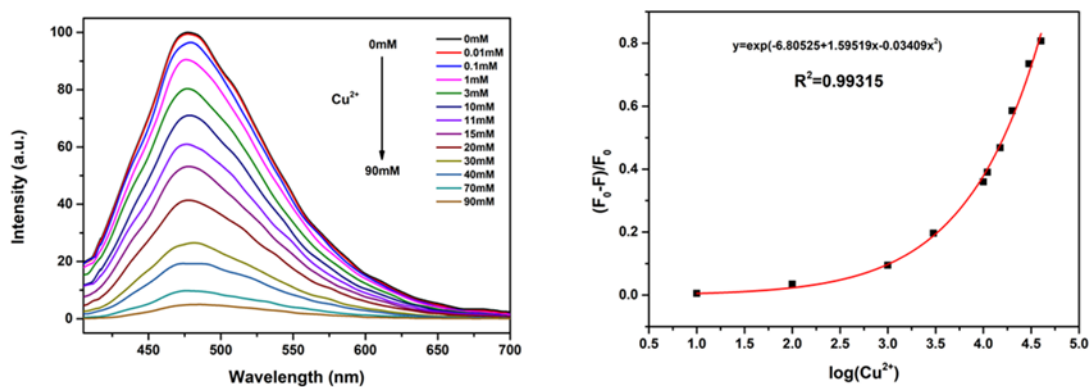

Figure S9: (A) Fluorescence spectra of FRGO solution with different concentrations of Cu<sup>2+</sup> at pH = 7; (B) The comparison of the obtained (F<sub>0</sub>-F)/F<sub>0</sub> for the detection of Cu<sup>2+</sup> at pH = 7

Table S1 RGO and FRGO, with C, N, and O contents (%) obtained from XPS analysis.

| Sample | C 1s  | N 1s | O 1s  |
|--------|-------|------|-------|
| RGO    | 84.16 | 0    | 15.84 |
| FRGO   | 81.98 | 5.77 | 12.25 |

Table S2 C 1s XPS deconvolution fitting results. All values are in percent

| Sample | C=C   | C-O(C-N) | C-C   | C=O  |
|--------|-------|----------|-------|------|
| RGO    | 67.45 | 8.58     | 21.34 | 2.64 |
| FRGO   | 44.75 | 27.8     | 22.01 | 6.42 |

Table S3 The value of residual weight (%) at 800°C and loss of 5% of the value of decomposition temperature (°C).

| Sample | The weight residual of 800 °C (%) | The decomposition temperature of 5 % (°C) |
|--------|-----------------------------------|-------------------------------------------|
| RGO    | 69.8                              | --                                        |
| FRGO   | 38.6                              | 168                                       |

Table S4 Detection of Fe<sup>3+</sup> ions in river water samples.

| Sample | Concentration(nM) |                 |                                |               |                                  |  |
|--------|-------------------|-----------------|--------------------------------|---------------|----------------------------------|--|
|        | Added             | Found by ICP-MS | Recovery <sup>a</sup> by MS(%) | Found by FRGO | Recovery <sup>a</sup> by FRGO(%) |  |
| 1      | 0                 | 35.45           | --                             | 33.80         | --                               |  |
| 2      | 10                | 45.27           | 98.2                           | 44.00         | 102.0                            |  |

<sup>a</sup>Recovery = (determined C<sub>metal ion</sub> of spiked sample - determined C<sub>metal ion</sub> of non-spiked sample)/added value × 100%.
